# Supplementary material for: A mechanochemical approach to the synthesis of sydnones and derivatives
Source: Royal Society of Chemistry journal article supplement (doi:10.1039/d2fd00096b), 2022-07-04

# A mechanochemical approach to the synthesis of sydnones and derivatives

Nicolas Pétry,<sup>a</sup> Florian Luttringer,<sup>a</sup> Xavier Bantreil<sup>\*a,b</sup> and Frédéric Lamaty<sup>\*a</sup>

*a) IBMM, Université de Montpellier, CNRS, ENSCM, Montpellier, France*

*b) Institut Universitaire de France (IUF)*

[xavier.bantreil@umontpellier.fr](mailto:xavier.bantreil@umontpellier.fr), [frederic.lamaty@umontpellier.fr](mailto:frederic.lamaty@umontpellier.fr)

## Supplementary information

|     |                                                      |   |
|-----|------------------------------------------------------|---|
| I.  | Synthetic procedures and analytical data.....        | 1 |
| II. | <sup>1</sup> H and <sup>13</sup> C NMR spectra ..... | 7 |

## I. Synthetic procedures and analytical data

### 4-Bromo-3-phenylsydnone (3)

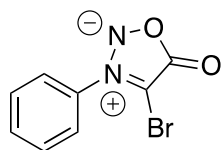

Chemical Formula:  $C_8H_5BrN_2O_2$   
Molecular weight: 241.04 g/mol

**Procedure:** Sydnone **1** (50.1 mg, 1 eq., 0.309 mmol) was put in a  $ZrO_2$  milling jar along with NBS (65.9 mg, 1.2 eq., 0.370 mmol). A  $ZrO_2$  ball (10 mm diameter) was added in the reactor, which was then closed and parafilmed. The reactor was milled for 1.5 h at 30 Hz. The reaction mixture was taken up with EtOAc and  $H_2O$ , extracted with EtOAc (3 times). The organic phase was washed with NaOH (1 M, 3 times) and brine, dried over  $MgSO_4$  and evaporated. The mixture was taken up with  $CH_2Cl_2$  and precipitated in pentane, filtered and the filtrate was recrystallized again in  $CH_2Cl_2$ /pentane yielding the title compound in 38 %.

$^1H$  NMR (400MHz,  $CDCl_3$ )  $\delta$  (ppm): 7.60-7.76 (m, 5H).

$^{13}C$  NMR (125 MHz,  $CD_3CN$ )  $\delta$  (ppm): 86.4, 126.1, 131.1, 133.7, 135.1, 166.9.

LCMS (ESI)  $m/z$ : 241.1 + 243.1  $[M+H]^+$ .

HRMS ESI-(+) calcd. For  $C_8H_5BrN_2O_2$   $[M+H]^+$  240.9613, found 240.9604.

### 4-iodo-3-phenylsydnone (4)

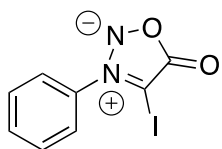

Chemical Formula:  $C_8H_5IN_2O_2$   
Molecular weight: 288.04 g/mol

**Procedure:** **1** (207.1 mg, 1 eq., 1.277 mmol) was added in a screw-top  $ZrO_2$  milling jar along with NIS (316.2 mg, 1.1 eq., 1.405 mmol) and AcOH (73  $\mu$ L, 1 eq., 1.277 mmol). A  $ZrO_2$  ball (10 mm diameter) was added in the reactor, which was then closed and parafilmed. The reactor was milled for 1.5 h at 30 Hz. The reaction mixture was taken up with EtOAc and  $H_2O$ , extracted with EtOAc (3 times). The organic phase was washed with NaOH (1 M, 3 times) and brine, dried over  $MgSO_4$  and evaporated, yielding the title compound in 74 %.

$^1H$  NMR (500 MHz,  $CDCl_3$ )  $\delta$  (ppm): 7.59-7.74 (m, 5H).

$^{13}C$  NMR (125 MHz,  $CDCl_3$ )  $\delta$  (ppm): 50.7, 125.2, 130.2, 132.8, 135.3, 169.0.

LCMS (ESI)  $m/z$ : 289.1  $[M+H]^+$ .

### 3,4-diphenylsydnone (5)

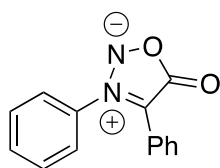

Chemical Formula:  $C_{14}H_{10}N_2O_2$

Molecular weight : 238.24 g/mol

**Procedure A: Suzuki-Miyaura coupling.** Compound **4** (1 eq., 0.044 mmol) was added in a screw-top SS milling jar (1.5 mL) along with the boron species (1.1 eq., 0.052 mmol),  $Pd(OAc)_2$  (5 mol%, 0.002 mmol), the ligand (10 mol%, 0.004 mmol) and the base (2 eq., 0.087 mmol). A SS ball (7 mm diameter) was added in the reactor, which was then closed. The reactor was milled for 0.5 h at 30 Hz with the heatgun set ca. 1 cm above. The reaction mixture was taken up with EtOAc and  $H_2O$ , extracted with EtOAc (3 times). The organic phase was washed with NaOH (1 M, 3 times) and brine, dried over  $MgSO_4$  and evaporated. The reaction mixture was then passed through a short pad of silica with cyclohexane:EtOAc (70:30) as eluent.

**Procedure B: C-H activation.** **4** (15.8 mg, 1 eq., 0.098 mmol) was added in a screw-top SS milling jar (1.5 mL) along with iodobenzene (12  $\mu$ L, 1.1 eq., 0.107 mmol),  $Pd(OAc)_2$  (1.1 mg, 5 mol%, 0.005 mmol), XPhos (4.6 mg, 10 mol%, 0.01 mmol) and  $Cs_2CO_3$  (63.6 mg, 2 eq., 0.195 mmol). A SS ball (7 mm diameter) was added in the reactor, which was then closed. The reactor was milled for 0.5 h at 30 Hz with the heatgun set ca. 1 cm above. The reaction mixture was taken up with EtOAc and  $H_2O$ , extracted with EtOAc (3 times). The organic phase was washed with NaOH (1 M, 3 times) and brine, dried over  $MgSO_4$  and evaporated. The reaction mixture was then passed through a short pad of silica with cyclohexane:EtOAc (70:30) as eluent.

$^1H$  NMR (500 MHz,  $CDCl_3$ )  $\delta$  (ppm): 7.27-7.30 (m, 5H), 7.47-7.50 (m, 2H), 7.56-7.60 (m, 2H), 7.65-7.69 (m, 1H).

$^{13}C$  NMR (125 MHz,  $CDCl_3$ )  $\delta$  (ppm): 124.5, 125.0, 127.5, 128.8, 128.9, 130.3, 132.3, 134.8, 167.3.

LCMS (ESI)  $m/z$ : 239.2  $[M+H]^+$

### 2-(Phenylamino)acetonitrile (6)

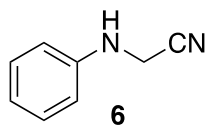

Chemical Formula:  $C_8H_8N_2$

Molecular Weight: 132.17

**Procedure:** in a 15 mL PTFE jar with 1 stainless steel ball (10 mm diameter) were introduced aniline (275  $\mu$ L, 3.0 mmol, 1 eq.), bromoacetonitrile (215  $\mu$ L, 3.0 mmol, 1 eq) and potassium carbonate (414 mg, 3.0 mmol, 1 eq.). The jar was closed and submitted to vibratory milling at 30 Hz for 90 min. The reaction mixture was recovered and diluted with EtOAc and filtered. The filtrate was washed with 10% aqueous  $KHSO_4$  solution, saturated  $NaHCO_3$  solution and brine. After drying over  $MgSO_4$  and filtration the solvent was removed *under vacuum* to furnish the desired aminonitrile as an orange oil (344 mg, 2.6 mmol, 86%).

$^1\text{H}$  NMR (400 MHz,  $\text{CDCl}_3$ )  $\delta$  (ppm): 4.10 (s, 2H), 6.73 (d,  $J = 7.8$  Hz, 2H), 6.90 (t,  $J = 7.4$  Hz, 1H), 7.26-7.31 (m, 2H).

$^{13}\text{C}$  NMR (100 MHz,  $\text{CDCl}_3$ )  $\delta$  (ppm): 32.8, 113.7 (2C), 117.1, 120.2, 129.7 (2C), 145.1.

LCMS (ESI)  $m/z$ : 133  $[\text{M}+\text{H}]^+$ .

### 5-Amino-3-phenyl-1,2,3-oxadiazolium hexafluorophosphate (8)

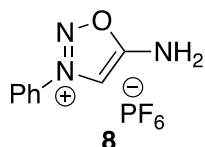

Chemical Formula:  $\text{C}_8\text{H}_8\text{N}_3\text{OPF}_6$

Molecular Weight: 307.14

**Procedure:** in a 10 mL stainless steel grinding jar with 1 ball of the same material (10 mm diameter) were introduced 2-(phenylethylamino)acetonitrile (133 mg, 1.0 mmol, 1 eq.), sodium hydrogenosulfate (720 mg, 6 mmol, 6 eq.) and sodium nitrite (70 mg, 1.0 mmol, 1 eq.). The jar was closed and submitted to vibratory milling at 30 Hz for 60 min. Potassium hexafluorophosphate (190 mg, 1.0 mmol, 1 eq) was added to the reaction mixture which was ground again at 30 Hz for 60 min. The resulting powder was suspended in EtOAc and filtered over a pad of Celite. The filtrate was concentrated *under vacuum* to yield the expected iminosydnone hexafluorophosphate salt as a beige powder (287 mg, 0.93 mmol, 93%).

$^1\text{H}$  NMR (400 MHz,  $\text{DMSO-}d_6$ )  $\delta$  (ppm): 7.76-7.86 (m, 3H), 8.02-8.04 (m, 2H), 8.60 (s, 1H), 9.69 (s, 2H).

$^{13}\text{C}$  NMR (100 MHz,  $\text{DMSO-}d_6$ )  $\delta$  (ppm): 102.5, 122.8 (2C), 130.4 (2C), 132.8, 133.7, 169.5.

LCMS (ESI)  $m/z$ : 162  $[\text{M}-\text{PF}_6]^+$ .

### 2-[(2-Phenylethyl)amino]acetonitrile (9)

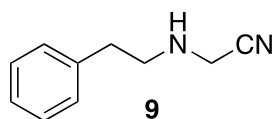

Chemical Formula:  $\text{C}_{10}\text{H}_{12}\text{N}_2$

Molecular Weight: 160.22

**Procedure:** Potassium carbonate (415 mg, 3.0 mmol, 3 eq), phenethylamine (126  $\mu\text{L}$ , 1.0 mmol, 1 eq.) and bromoacetonitrile (72  $\mu\text{L}$ , 1.0 mmol, 1 eq) were introduced in a 10 mL zirconium oxide grinding jar with 2 balls of the same material (10 mm diameter). The jar was closed and submitted to vibratory milling at 25 Hz for 60 min. The white solid was recovered with EtOAc and the suspension was filtered. The filtrate was washed with water and brine, dried over  $\text{MgSO}_4$  and the solvent was evaporated *under vacuum* to give the desired aminonitrile as a translucent oil (150 mg, 0.93 mmol, 93%).

$^1\text{H}$  NMR (400 MHz,  $\text{CDCl}_3$ )  $\delta$  (ppm): 2.84 (t,  $J = 6.9$  Hz, 2H), 3.02 (t,  $J = 6.9$  Hz, 2H), 3.59 (s, 2H), 7.21-7.25 (m, 3H), 7.30-7.34 (m, 2H).

$^{13}\text{C}$  NMR (100 MHz,  $\text{CDCl}_3$ )  $\delta$  (ppm): 35.9, 37.5, 49.9, 117.8, 126.7, 128.8, 139.0.

HRMS ESI-(+) calcd. for  $\text{C}_{10}\text{H}_{13}\text{N}_2$   $[\text{M}+\text{H}]^+$  161.1073, found 161.1075.

### 5-Amino-3-(2-phenylethyl)-1,2,3-oxadiazolium hexafluorophosphate (10)

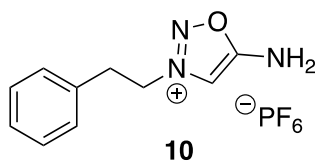

Chemical Formula:  $C_{10}H_{12}N_3OPF_6$

Molecular Weight: 335.19

**Procedure:** in a 10 mL zirconium oxide grinding jar with 1 ball of the same material (12 mm diameter) were introduced 2-[(2-phenylethyl)amino]acetonitrile (133 mg, 0.83 mmol, 1 eq.), sodium hydrogensulfate (600 mg, 5.0 mmol, 6 eq) and sodium nitrite (70 mg, 1.0 mmol, 1.2 eq.). The jar was closed and submitted to vibratory milling at 30 Hz for 90 min. Potassium hexafluorophosphate (156 mg, 0.83 mmol, 1 eq.) was added to the reaction mixture which was ground again at 30 Hz for 90 min. The resulting powder was suspended in EtOAc and filtered over a pad of Celite. The filtrate was concentrated under *vacuum* to yield the expected iminosydnone hexafluorophosphate salt as an off-white powder (260 mg, 0.77 mmol, 93%).

$^1H$  NMR (400 MHz, DMSO- $d_6$ )  $\delta$  (ppm): 3.30 (t,  $J = 7.2$  Hz, 2H), 4.91 (t,  $J = 7.2$  Hz, 2H), 7.25-7.36 (m, 5H), 7.97 (s, 1H), 9.43 (s, 2H).

$^{13}C$  NMR (100 MHz, DMSO- $d_6$ )  $\delta$  (ppm): 33.8, 54.4, 102.8, 127.2, 128.7 (2C), 128.8 (2C), 135.8, 169.0.

LCMS (ESI)  $m/z$ : 190  $[M-PF_6]^{+}$ .

#### 2-(4-Morpholinylamino)acetonitrile (11)

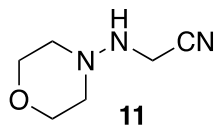

Chemical Formula:  $C_6H_{11}N_3O$

Molecular Weight: 141.17

**Procedure:** Silica (400 mg, 6.6 mmol, 6 eq.), paraformaldehyde (35 mg, 1.1 mmol, 1 eq) and 4-aminomorpholine (110  $\mu$ L, 1.1 mmol, 1 eq.) were introduced in a 10 mL stainless steel grinding jar with 5 stainless steel balls (7 mm diameter). The jar was closed and submitted to vibratory milling at 25 Hz for 30 min. Potassium cyanide (80 mg, 1.21 mmol, 1.1 eq.) was added to the reaction mixture and the jar subjected to milling for a new period of 90 min at 25 Hz.

The white powder was recovered with EtOAc and the suspension was filtered over a pad of Celite. The filtrate was concentrated under *vacuum* to furnish the expected aminonitrile as a yellow oil (195 mg, 1.02 mmol, 93%).

$^1H$  NMR (400 MHz,  $CDCl_3$ )  $\delta$  (ppm): 2.59 (m, 1H), 2.76 (m, 4H), 3.69 (d,  $J = 5.8$  Hz, 2H), 3.73 (t,  $J = 4.6$  Hz, 4H).

$^{13}C$  NMR (100 MHz,  $CDCl_3$ )  $\delta$  (ppm): 37.8, 56.8 (2C), 67.0 (2C), 118.4.

LCMS (ESI)  $m/z$ : 142  $[M+H]^{+}$ .

#### 5-Amino-3-(4-morpholinyl)-1,2,3-oxadiazolium hexafluorophosphate (12)

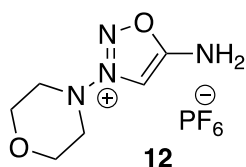

Chemical Formula:  $C_6H_{11}N_4O_2PF_6$

Molecular Weight: 316.14

**Procedure:**

Method A: in a 10 mL zirconium oxide grinding jar with 2 balls of the same material (10 mm diameter) were introduced 2-(4-morpholinylamino)acetonitrile (199 mg, 1.4 mmol, 1 eq), sodium hydrogensulfate (1.010 mg, 8.4 mmol, 6 eq) and sodium nitrite (109 mg, 1.54 mmol, 1.1 eq). The jar was closed and submitted to vibratory milling at 30 Hz for 60 min. Potassium hexafluorophosphate (260 mg, 1.4 mmol, 1 eq) was added to the reaction mixture which was ground again at 30 Hz for 60 min. The resulting solid was suspended in EtOAc and filtered over a pad of Celite. The filtrate was concentrated *under vacuum* to yield the expected iminosydnone hexafluorophosphate salt as a yellow solid (399 mg, 1.26 mmol, 90%).

Method B: in a 10 mL zirconium oxide grinding jar with 1 ball of the same material (12 mm diameter) were introduced 2-(4-morpholinylamino)acetonitrile (154 mg, 1.08 mmol, 1 eq.), sodium hydrogensulfate (720 mg, 6 mmol, 5.5 eq.) and sodium nitrite (75 mg, 1.08 mmol, 1 eq.). The jar was closed and submitted to vibratory milling at 30 Hz for 60 min. Potassium hexafluorophosphate (180 mg, 0.95 mmol, 1 eq.) was added to the reaction mixture which was ground again at 30 Hz for 60 min. The resulting solid was suspended in a minimal amount of water (1.5 mL) and filtered over sintered glass, rinsing with 0.5 mL of water. The solid was dried *under vacuum* over  $P_2O_5$  to yield the expected iminosydnone hexafluorophosphate salt as a beige solid (163 mg, 0.51 mmol, 47%).

$^1H$  NMR (400 MHz, DMSO- $d_6$ )  $\delta$  (ppm): 3.60 (t,  $J = 4.7$  Hz, 4H), 3.87 (t,  $J = 4.7$  Hz, 4H), 8.19 (s, 1H), 9.35 (s, 2H).

$^{13}C$  NMR (100 MHz, DMSO- $d_6$ )  $\delta$  (ppm): 53.4 (2C), 64.6 (2C), 96.5, 168.5.

LCMS (ESI)  $m/z$ : 171  $[M-PF_6]^{+}$ .

## II. $^1\text{H}$ and $^{13}\text{C}$ NMR spectra

### 4-bromo-3-phenylsydnone (3)

$^1\text{H}$  spectrum (400 MHz,  $\text{CDCl}_3$ ):

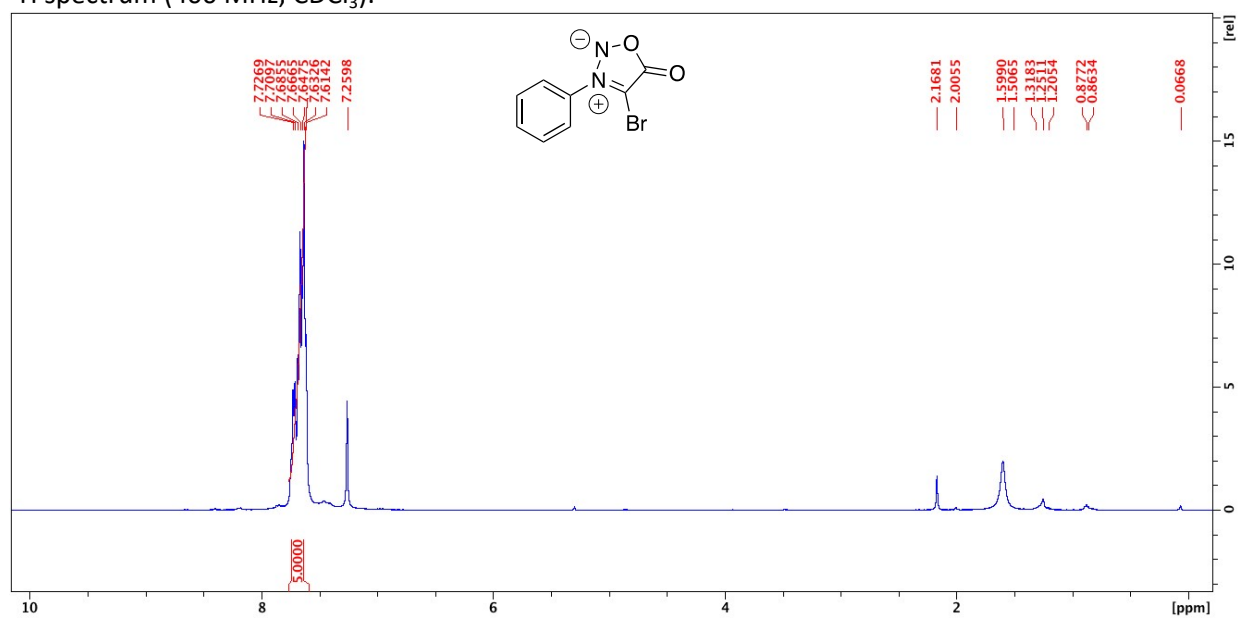

$^{13}\text{C}$  NMR spectrum (100 MHz,  $\text{CD}_3\text{CN}$ ):





### 4-iodo-3-phenylsydnone (4)

<sup>1</sup>H spectrum (500 MHz, CDCl<sub>3</sub>):

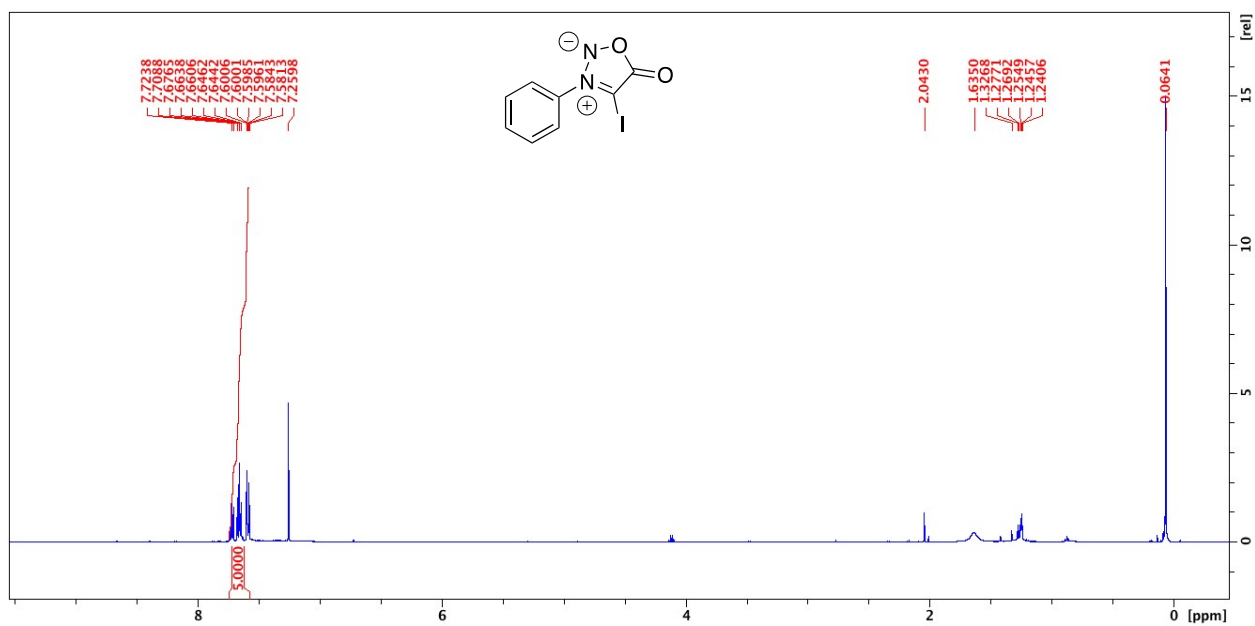

<sup>13</sup>C spectrum (125 MHz, CDCl<sub>3</sub>):

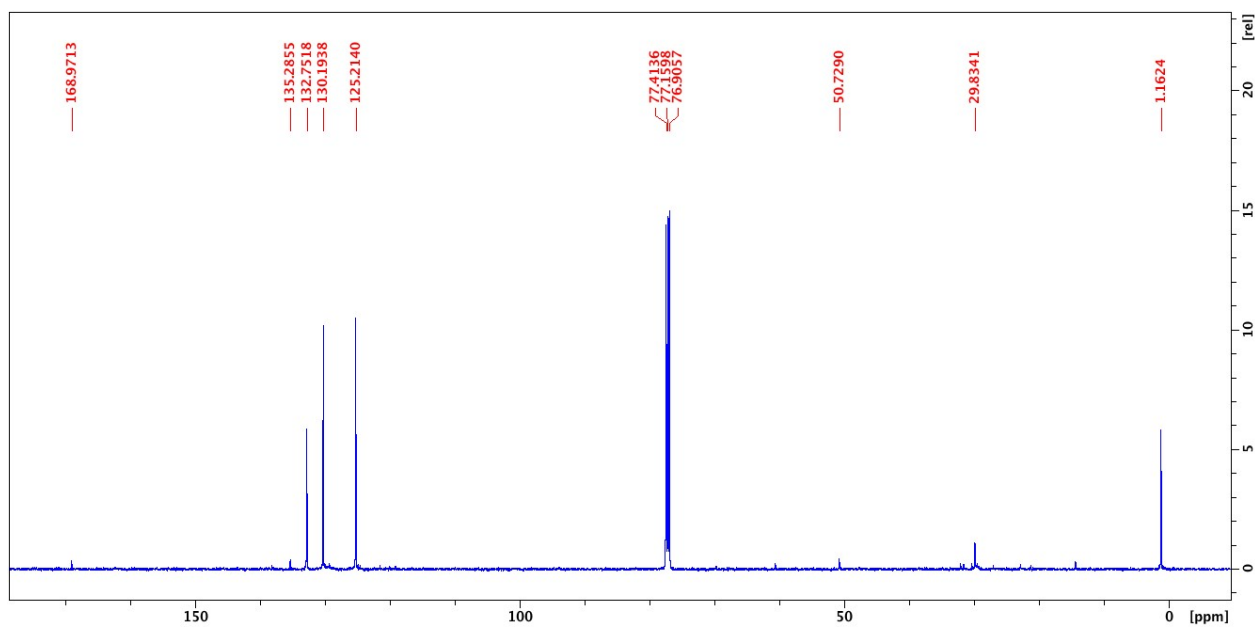

### 3,4-diphenylsydnone (5)

$^1\text{H}$  spectrum (500 MHz,  $\text{CDCl}_3$ ):

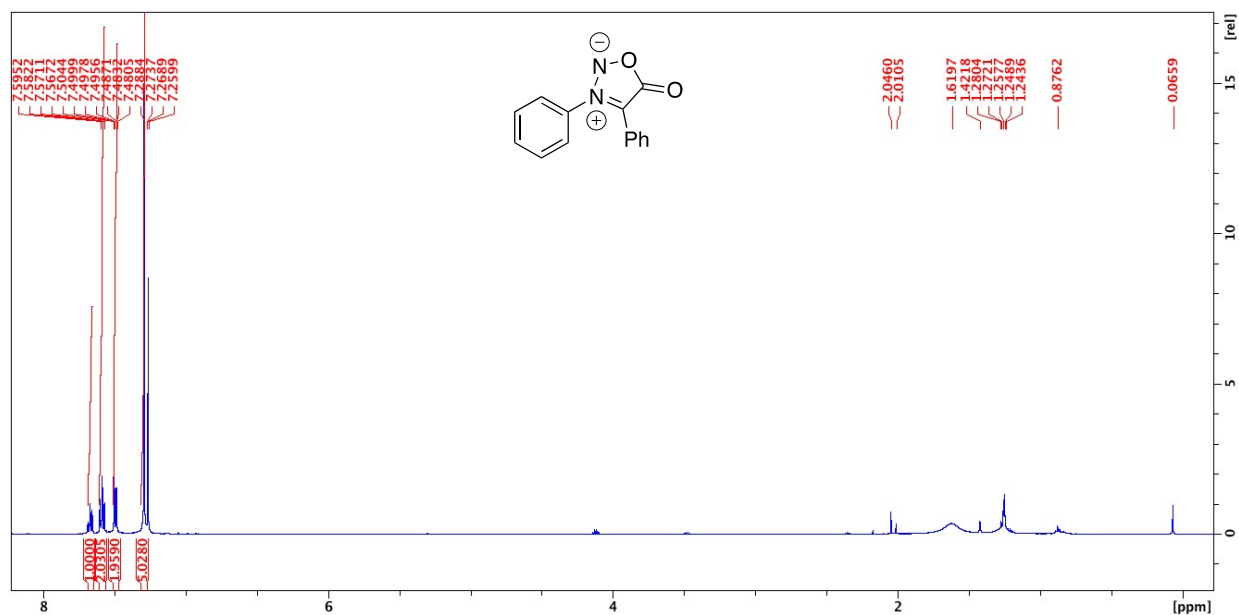

$^{13}\text{C}$  spectrum (125 MHz,  $\text{CDCl}_3$ ):

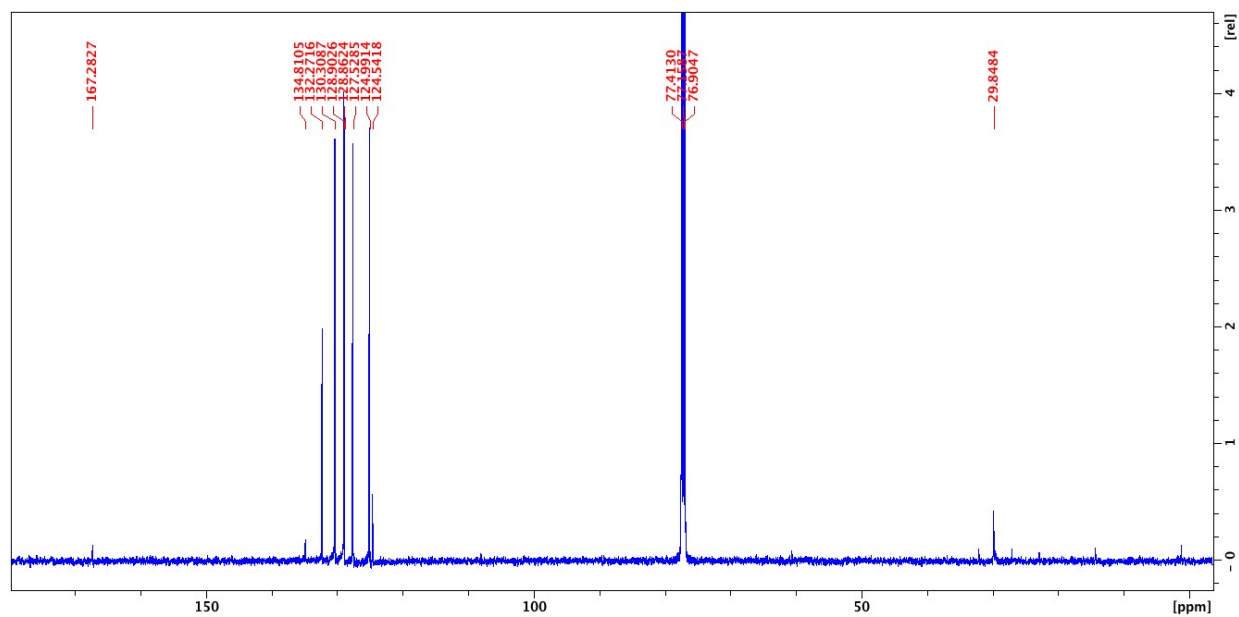

**2-(Phenylamino)acetonitrile (6)**

$^1\text{H}$  NMR spectrum (400 MHz,  $\text{CDCl}_3$ ):

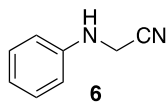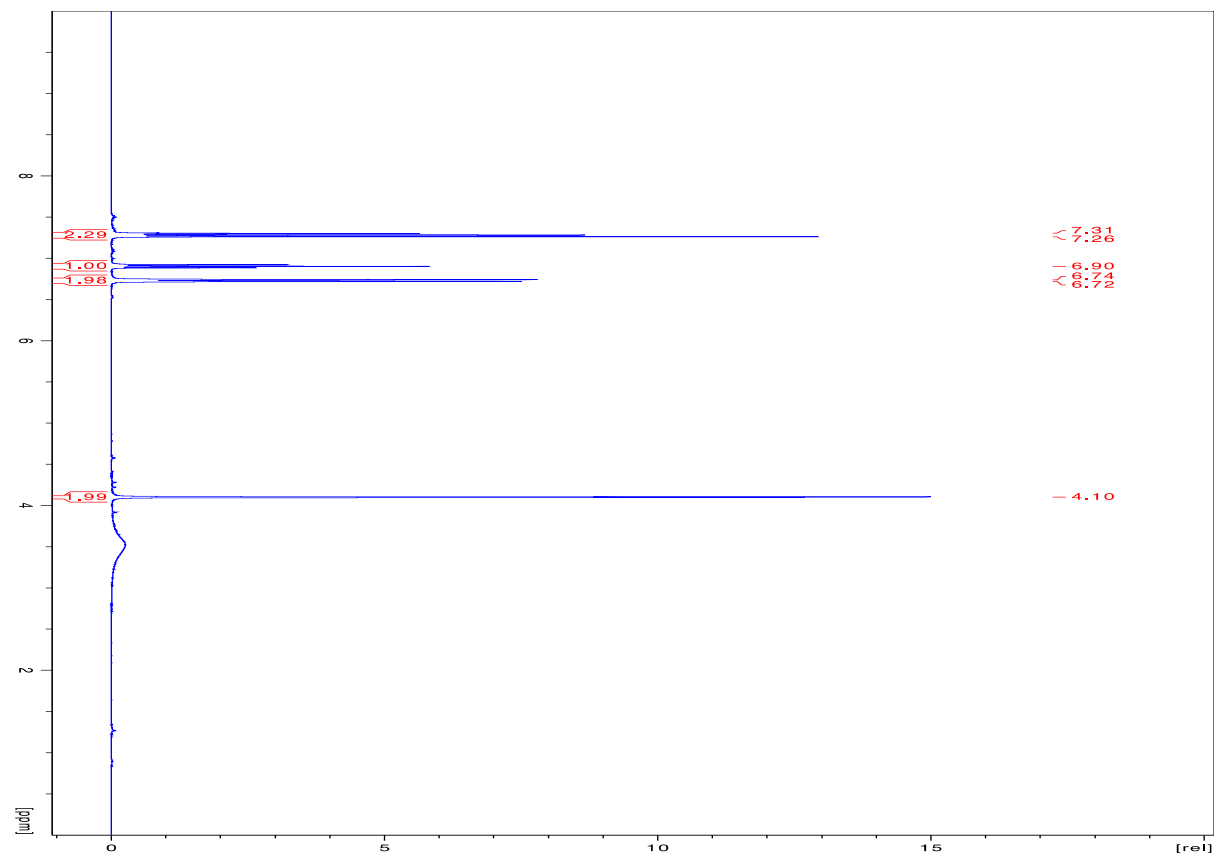

$^{13}\text{C}$  NMR spectrum (100 MHz,  $\text{CDCl}_3$ ):

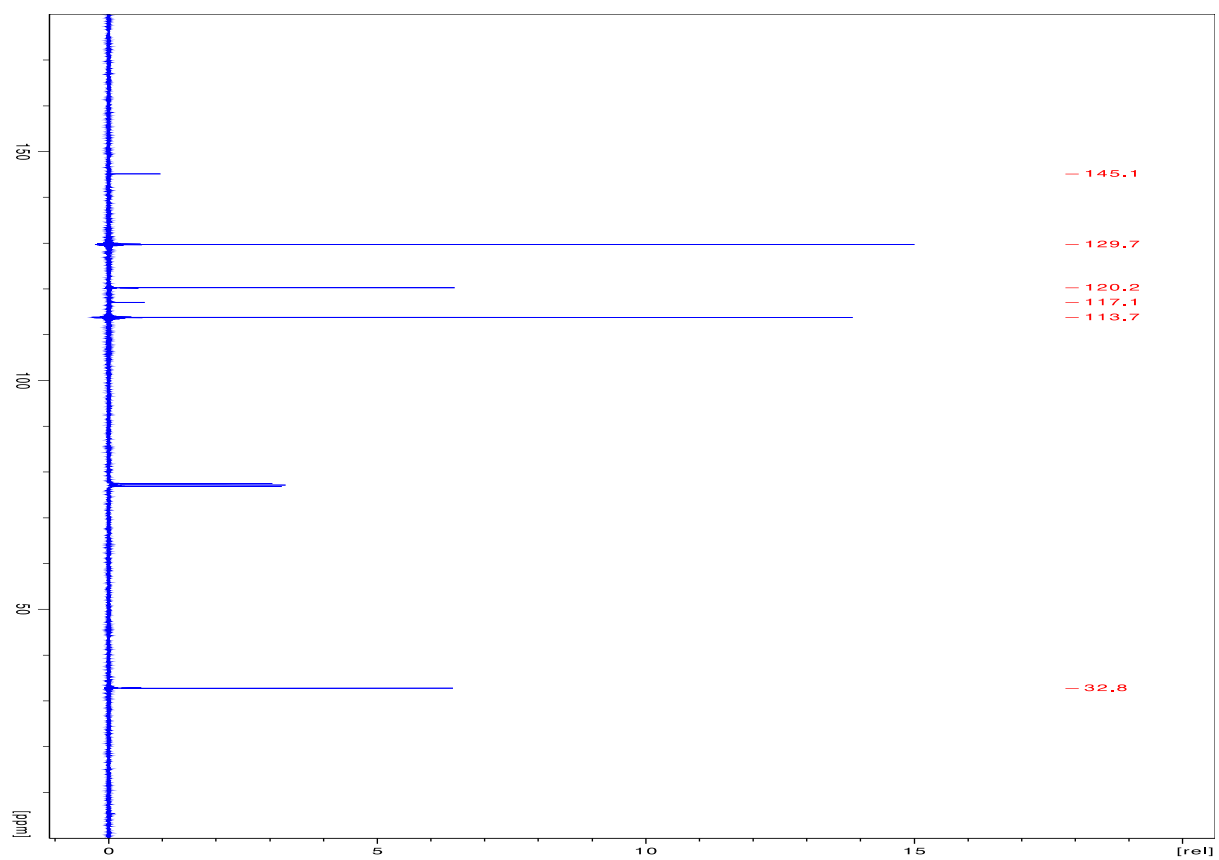

**5-Amino-3-phenyl-1,2,3-oxadiazolium hexafluorophosphate (8)**

$^1\text{H}$  NMR spectrum (400 MHz,  $\text{DMSO-}d_6$ ):

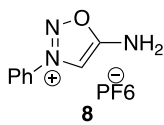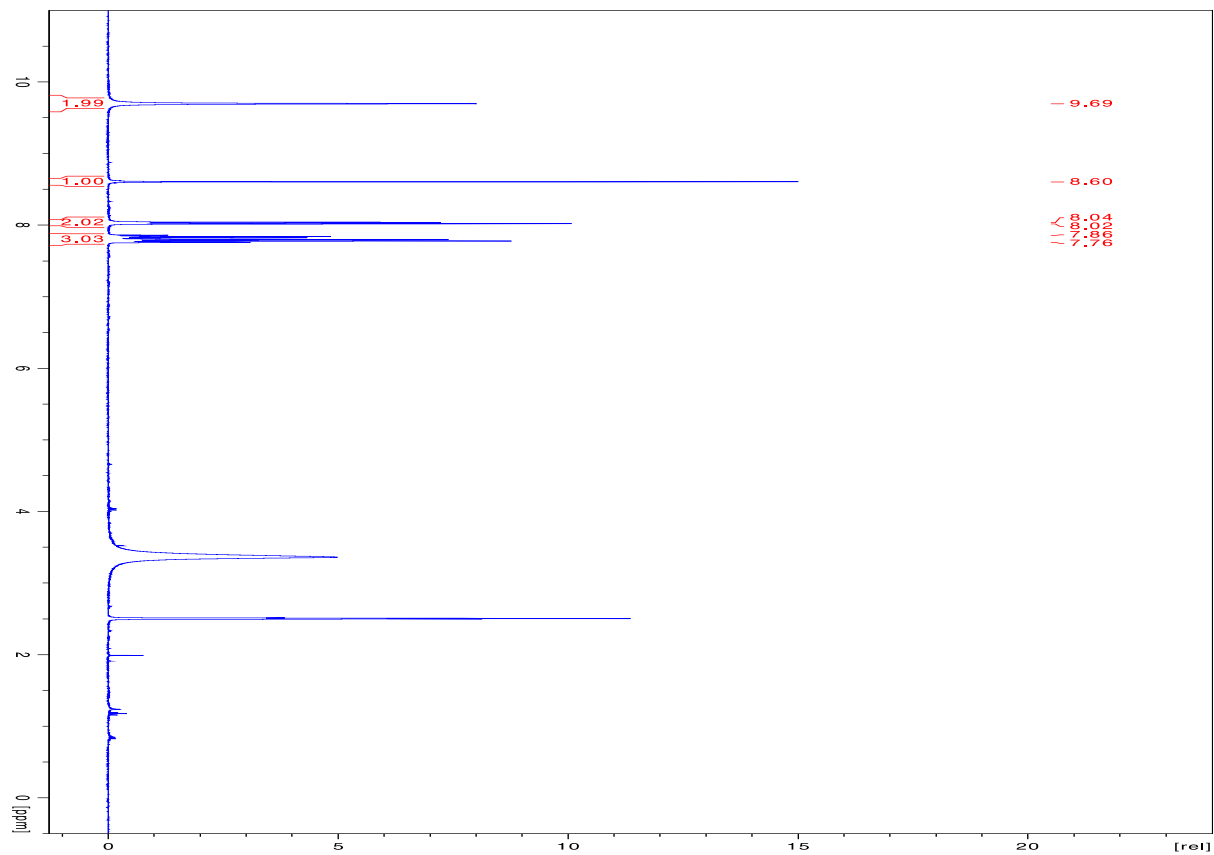

$^{13}\text{C}$  NMR spectrum (100 MHz,  $\text{DMSO-}d_6$ ):

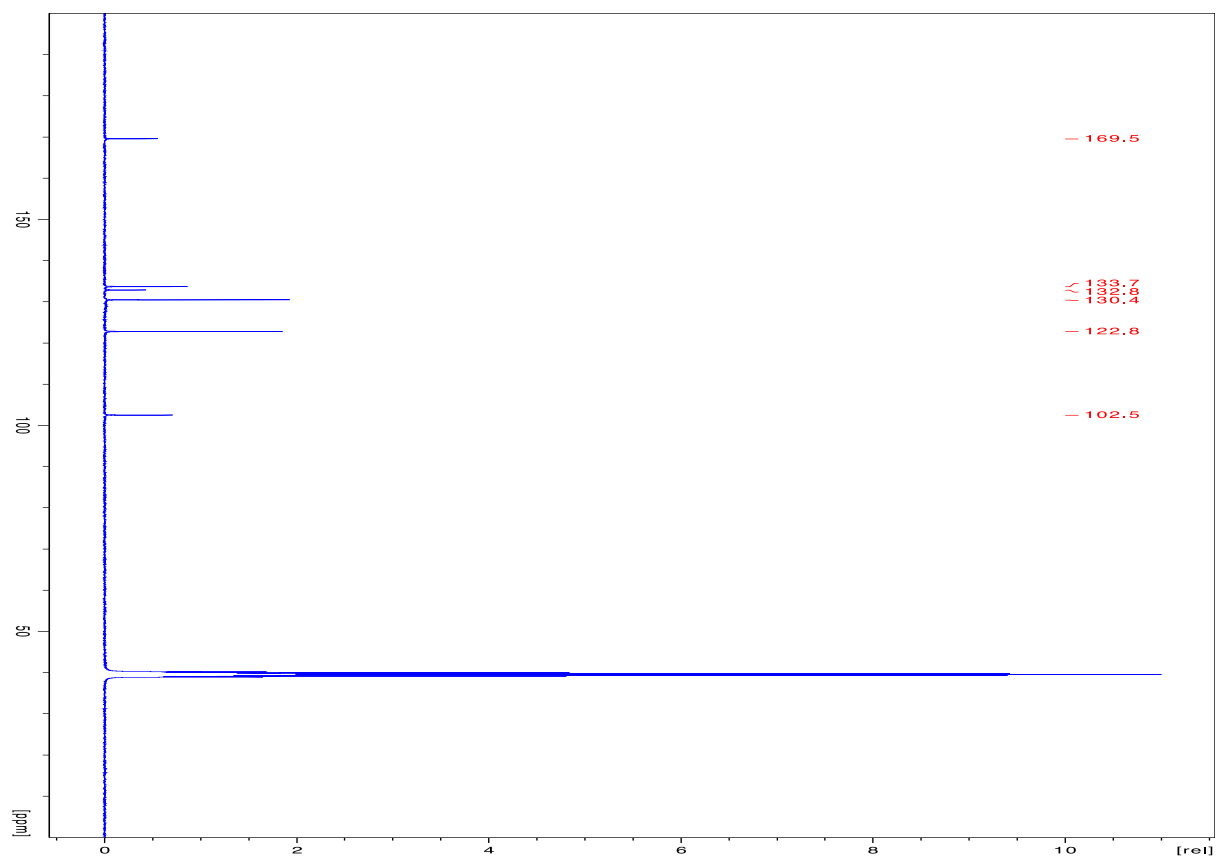

**2-[(2-Phenylethyl)amino]acetonitrile (9)**

<sup>1</sup>H NMR spectrum (400 MHz, CDCl<sub>3</sub>):

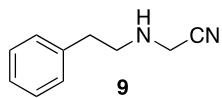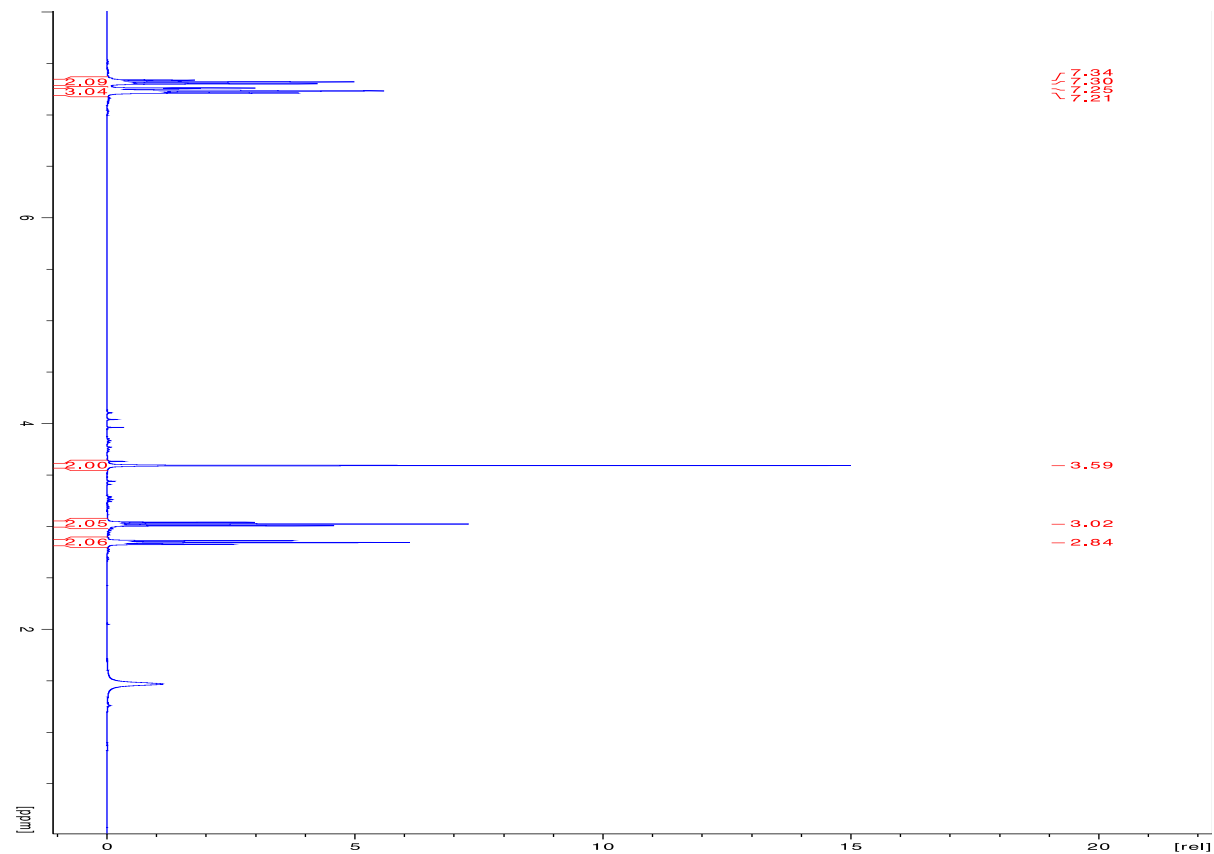

<sup>13</sup>C NMR spectrum (100 MHz, CDCl<sub>3</sub>):

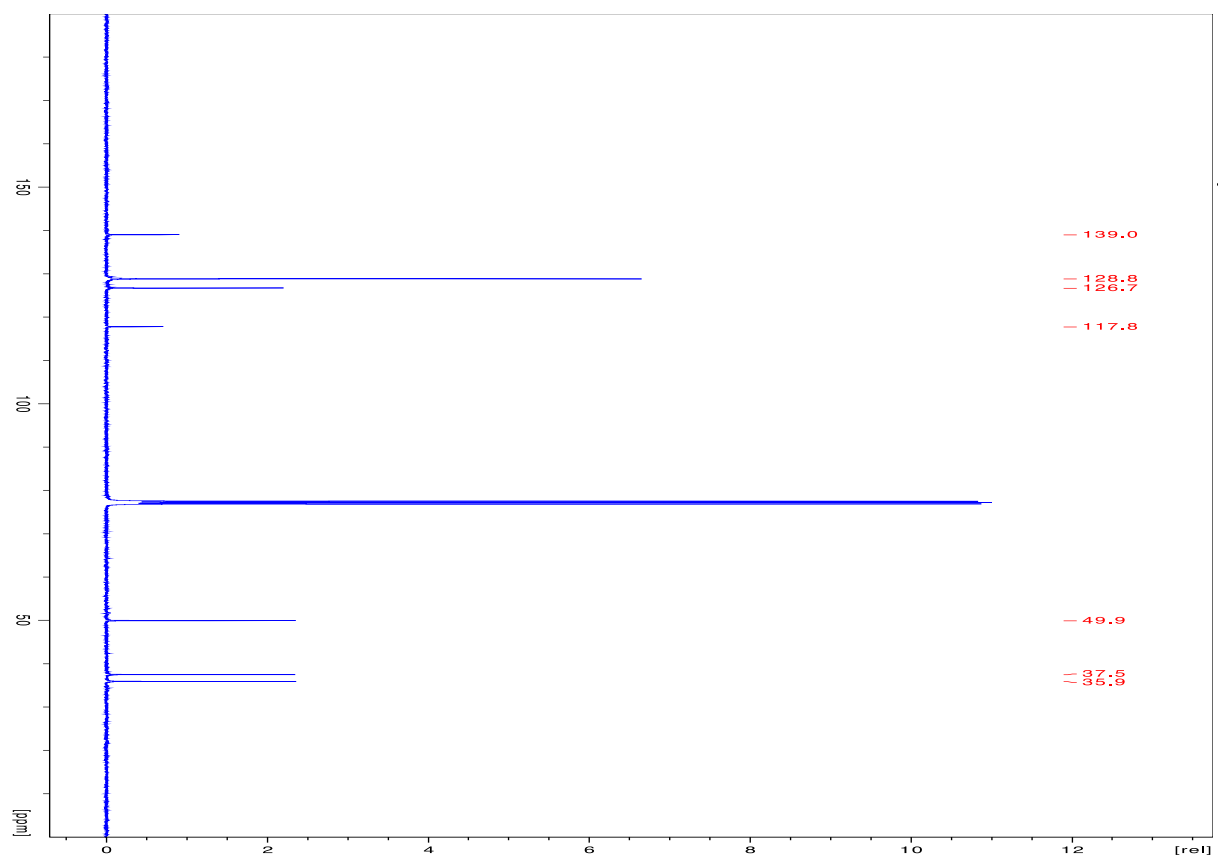



### 5-Amino-3-(2-phenylethyl)-1,2,3-oxadiazolium hexafluorophosphate (10)

$^1\text{H}$  NMR spectrum (400 MHz,  $\text{DMSO-}d_6$ ):

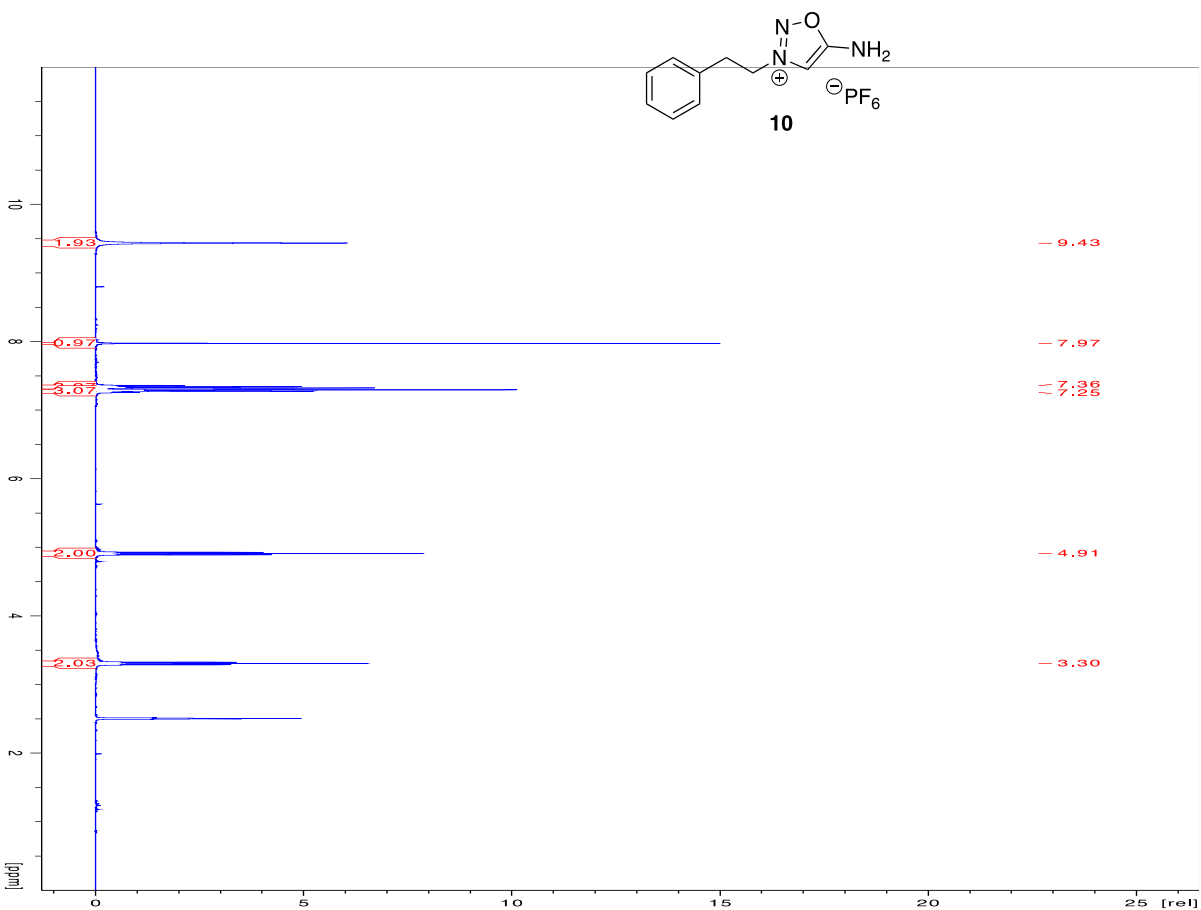

$^{13}\text{C}$  NMR spectrum (100 MHz,  $\text{DMSO-}d_6$ ):

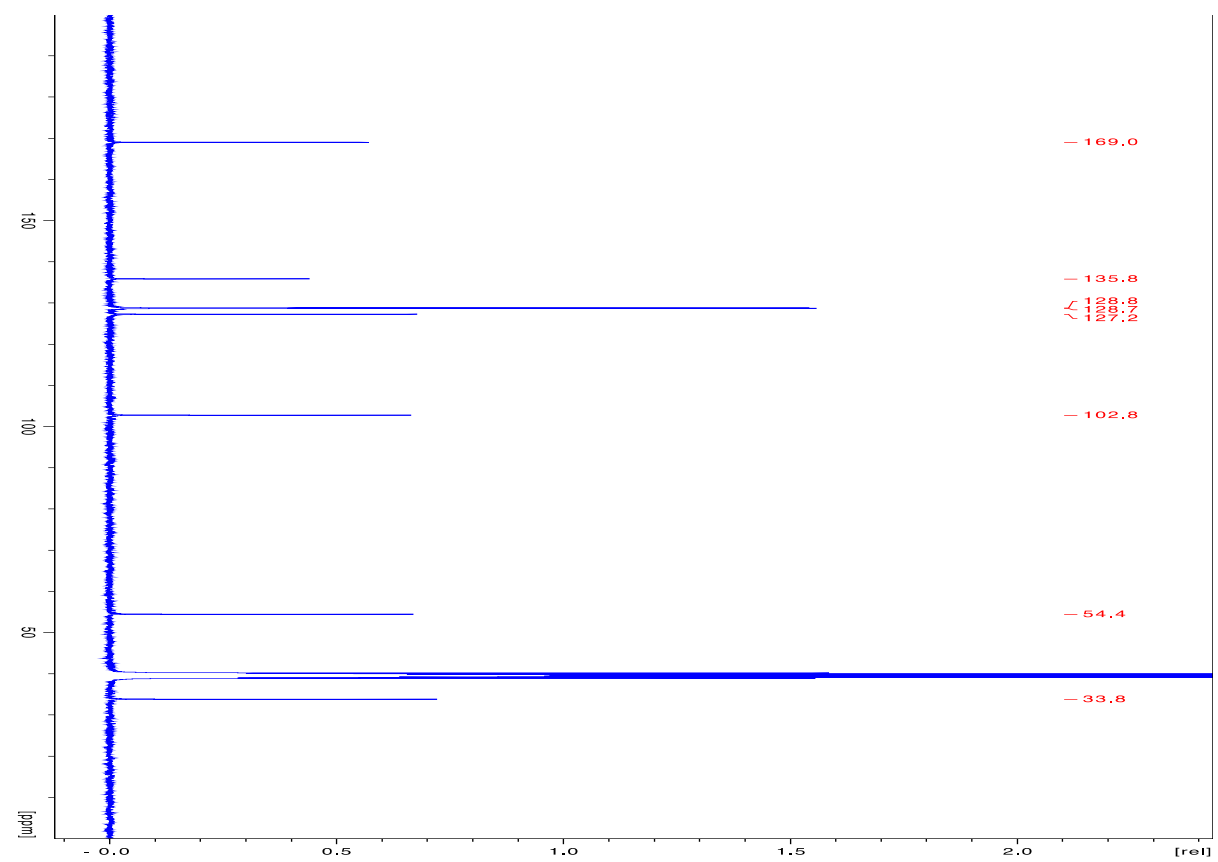

**2-(4-Morpholinylamino)acetonitrile (11)**

$^1\text{H}$  NMR spectrum (400 MHz,  $\text{CDCl}_3$ ):

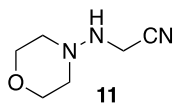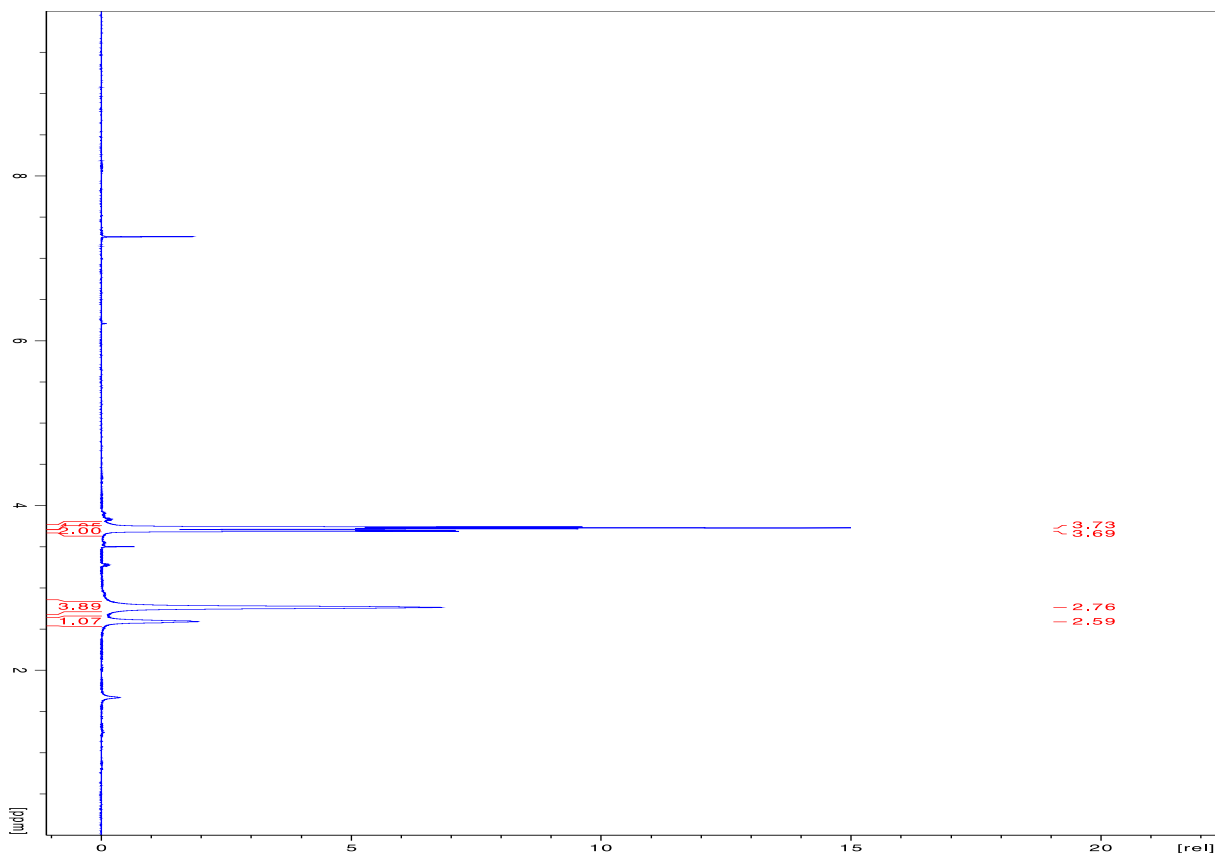

$^{13}\text{C}$  NMR spectrum (100 MHz,  $\text{CDCl}_3$ ):

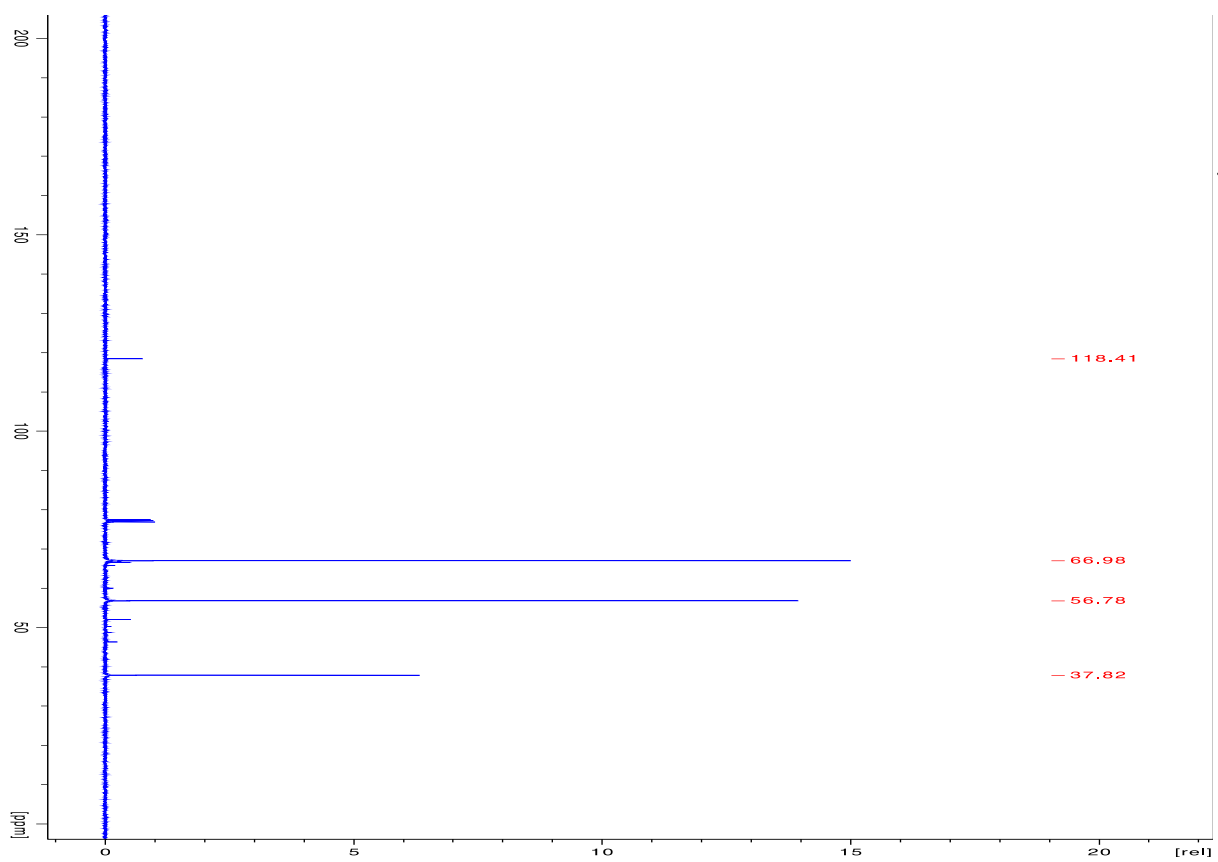

### 5-Amino-3-(4-morpholinyl)-1,2,3-oxadiazolium hexafluorophosphate (**12**)

$^1\text{H}$  NMR spectrum (400 MHz,  $\text{DMSO-}d_6$ ):

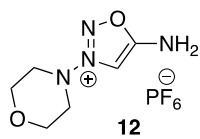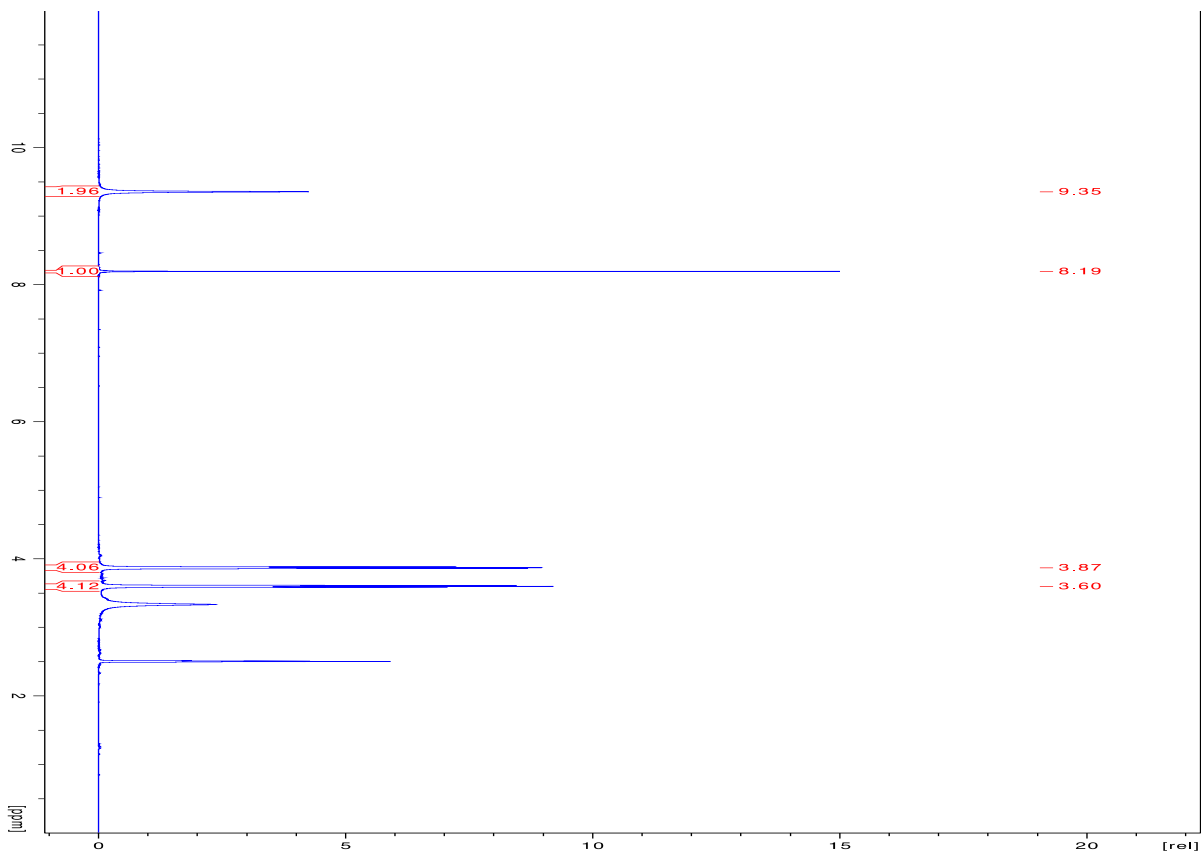

$^{13}\text{C}$  NMR spectrum (100 MHz,  $\text{DMSO-}d_6$ ):

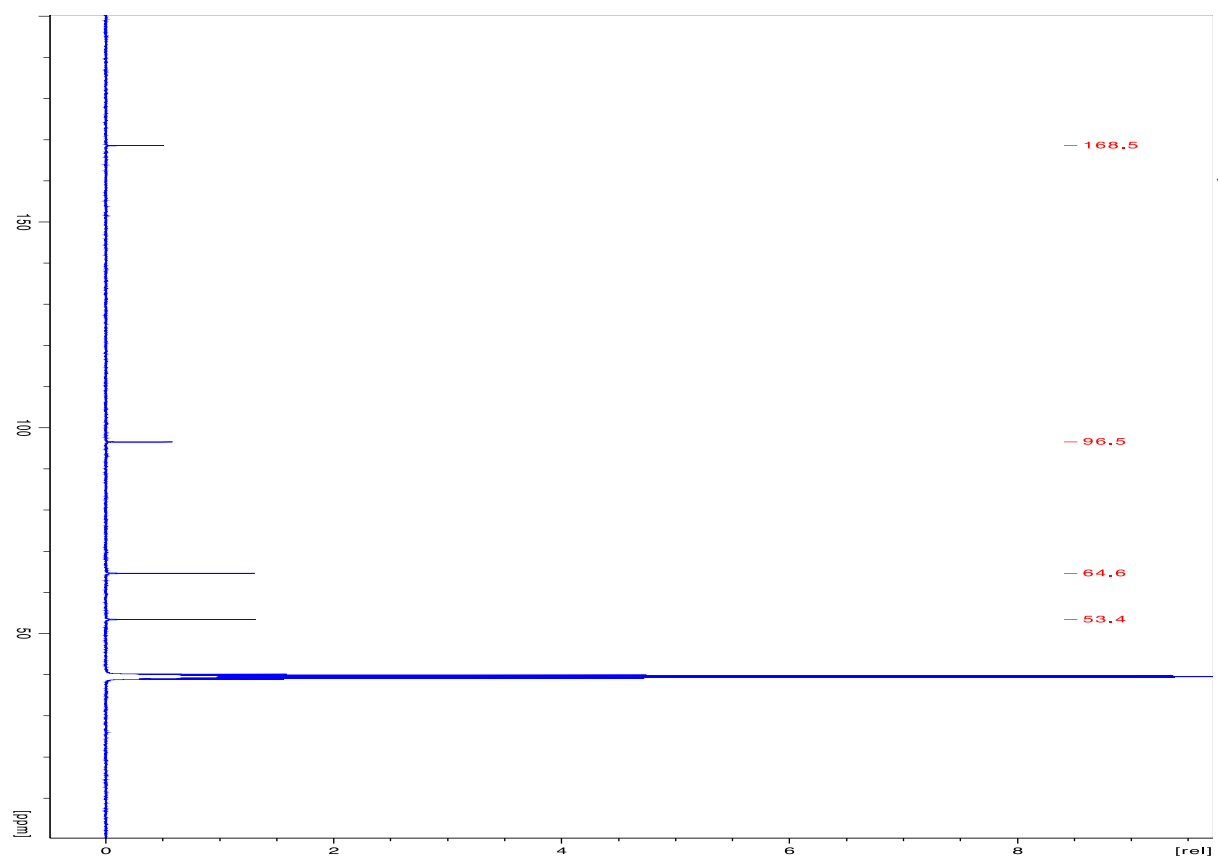

Supplement: d2fd00096b1.pdf [file d2fd00096b1.pdf]
